# Supplementary material for: Experience of, awareness of and help-seeking for potential cancer symptoms in smokers and non-smokers: A cross-sectional study
Source: PLOS journal article supplement (doi:10.1371/journal.pone.0183647), 2017-08-28
Supplement: S2 (10.1371/journal.pone.0183647.s002) [file journal.pone.0183647.s002]

For office use only

☐☐☐☐☐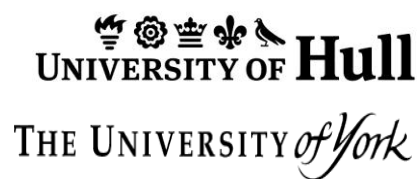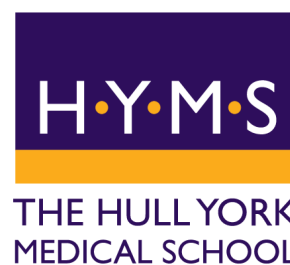

# Symptoms Awareness Survey

---

**THIS PAGE HAS BEEN LEFT BLANK INTENTIONALLY.**

**Thank you for agreeing to complete this survey.**

- **It should take no longer than 20 minutes to complete. You may, however, take as long as you want.**
- **Your answers will be treated in the strictest confidence.**
- **Please return the questionnaire in the freepost envelope (no stamp required). By returning the questionnaire you are consenting to take part in the study.**

**If you would like help with this questionnaire,  
please call: 01482 463128**

## FIRST, WE WOULD LIKE TO ASK YOU SOME QUESTIONS ABOUT YOUR HEALTH

**Do you have any illnesses or conditions that affect your daily life?**

Yes ☐

No ☐

**Do you have any of the following conditions/illnesses?**

**Please tick Yes for each condition/illness you have**

**Yes**

Arthritis ☐

Cancer ☐

Circulation problems ☐

Chest problems ☐

Cholesterol problems ☐

Depression ☐

Diabetes ☐

Heart problems ☐

High blood pressure ☐

Kidney problems ☐

Stroke ☐

Other ☐

**If you have answered 'Other', please write the names of the illnesses or conditions here**

## Access to health care

|                                                                                                    |                  |                          |
|----------------------------------------------------------------------------------------------------|------------------|--------------------------|
| Are you able to access health care services such as the doctor or practice nurse when you need to? | All of the time  | <input type="checkbox"/> |
|                                                                                                    | Most of the time | <input type="checkbox"/> |
|                                                                                                    | Sometimes        | <input type="checkbox"/> |
|                                                                                                    | No               | <input type="checkbox"/> |

If **NO**, what stops you from accessing these services when you need to?

**Please tick as many as apply**

|                                                          |                          |
|----------------------------------------------------------|--------------------------|
| Too busy / not enough time                               | <input type="checkbox"/> |
| Difficulty getting an appointment                        | <input type="checkbox"/> |
| Financial reasons                                        | <input type="checkbox"/> |
| A health condition, illness or impairment, or disability | <input type="checkbox"/> |
| Lack of public transport, is infrequent or unreliable    | <input type="checkbox"/> |
| No access to a car as a driver or passenger              | <input type="checkbox"/> |
| Fear of crime (for example mugging or robbery)           | <input type="checkbox"/> |
| Anxiety                                                  | <input type="checkbox"/> |
| Lack of confidence in doctors or nurses                  | <input type="checkbox"/> |
| Other reasons                                            | <input type="checkbox"/> |

If you have ticked 'Other reasons', please write them down here

**The next section asks you about symptoms or changes you have noticed in your health that you have had in the last 3 months.**

- Please read the 17 symptoms down the left hand side and if you haven't had it, tick 'NO' and move down the page to the next symptom.
- If you tick 'YES', then please answer the other questions about the symptoms which are across the top of the page.

**PLEASE TURN OVER THE PAGE**

## THESE QUESTIONS ARE ABOUT YOUR EXPERIENCE OF SYMPTOMS IN THE **LAST 3 MONTHS**.

*Please read the 17 symptoms down the left hand side and if you haven't had it, tick 'NO' and move down the page to the next symptom.*

*If you tick 'YES', then please answer the other questions about the symptoms which are across the top of the page.*

| In the last 3 months or so, have you had the following....?<br><i>Please give an answer for each symptom</i>     | Were you worried about it?                                                                                                                                                                        | How much did it interfere with your life?                                                                                                                                                         | What did <u>you</u> think caused it?<br>(Please write) | Did you contact your doctor about it?                                                                                                                                                                                          | If you did contact your doctor, what was the outcome?                                                                                                            |
|------------------------------------------------------------------------------------------------------------------|---------------------------------------------------------------------------------------------------------------------------------------------------------------------------------------------------|---------------------------------------------------------------------------------------------------------------------------------------------------------------------------------------------------|--------------------------------------------------------|--------------------------------------------------------------------------------------------------------------------------------------------------------------------------------------------------------------------------------|------------------------------------------------------------------------------------------------------------------------------------------------------------------|
| <b>1. Cough that didn't go away</b><br><input type="checkbox"/> NO <input type="checkbox"/> YES →<br>↓           | <input type="checkbox"/> Not at all<br><input type="checkbox"/> A little bit<br><input type="checkbox"/> Moderately<br><input type="checkbox"/> Quite a bit<br><input type="checkbox"/> Extremely | <input type="checkbox"/> Not at all<br><input type="checkbox"/> A little bit<br><input type="checkbox"/> Moderately<br><input type="checkbox"/> Quite a bit<br><input type="checkbox"/> Extremely | <br><br>                                               | <input type="checkbox"/> No<br><input type="checkbox"/> Yes, within 1-2 weeks<br><input type="checkbox"/> Yes, within 1 month<br><input type="checkbox"/> Yes, within 6 weeks<br><input type="checkbox"/> Yes, within 3 months | <input type="checkbox"/> further tests<br><input type="checkbox"/> diagnosis<br><input type="checkbox"/> treatment<br><input type="checkbox"/> told to come back |
| <b>2. Unexplained shortness of breath</b><br><input type="checkbox"/> NO <input type="checkbox"/> YES →<br>↓     | <input type="checkbox"/> Not at all<br><input type="checkbox"/> A little bit<br><input type="checkbox"/> Moderately<br><input type="checkbox"/> Quite a bit<br><input type="checkbox"/> Extremely | <input type="checkbox"/> Not at all<br><input type="checkbox"/> A little bit<br><input type="checkbox"/> Moderately<br><input type="checkbox"/> Quite a bit<br><input type="checkbox"/> Extremely | <br><br>                                               | <input type="checkbox"/> No<br><input type="checkbox"/> Yes, within 1-2 weeks<br><input type="checkbox"/> Yes, within 1 month<br><input type="checkbox"/> Yes, within 6 weeks<br><input type="checkbox"/> Yes, within 3 months | <input type="checkbox"/> further tests<br><input type="checkbox"/> diagnosis<br><input type="checkbox"/> treatment<br><input type="checkbox"/> told to come back |
| <b>3. Unexplained weight loss</b><br><input type="checkbox"/> NO <input type="checkbox"/> YES →<br>↓             | <input type="checkbox"/> Not at all<br><input type="checkbox"/> A little bit<br><input type="checkbox"/> Moderately<br><input type="checkbox"/> Quite a bit<br><input type="checkbox"/> Extremely | <input type="checkbox"/> Not at all<br><input type="checkbox"/> A little bit<br><input type="checkbox"/> Moderately<br><input type="checkbox"/> Quite a bit<br><input type="checkbox"/> Extremely | <br><br>                                               | <input type="checkbox"/> No<br><input type="checkbox"/> Yes, within 1-2 weeks<br><input type="checkbox"/> Yes, within 1 month<br><input type="checkbox"/> Yes, within 6 weeks<br><input type="checkbox"/> Yes, within 3 months | <input type="checkbox"/> further tests<br><input type="checkbox"/> diagnosis<br><input type="checkbox"/> treatment<br><input type="checkbox"/> told to come back |
| <b>4. Chest infection that didn't go away</b><br><input type="checkbox"/> NO <input type="checkbox"/> YES →<br>↓ | <input type="checkbox"/> Not at all<br><input type="checkbox"/> A little bit<br><input type="checkbox"/> Moderately<br><input type="checkbox"/> Quite a bit<br><input type="checkbox"/> Extremely | <input type="checkbox"/> Not at all<br><input type="checkbox"/> A little bit<br><input type="checkbox"/> Moderately<br><input type="checkbox"/> Quite a bit<br><input type="checkbox"/> Extremely | <br><br>                                               | <input type="checkbox"/> No<br><input type="checkbox"/> Yes, within 1-2 weeks<br><input type="checkbox"/> Yes, within 1 month<br><input type="checkbox"/> Yes, within 6 weeks<br><input type="checkbox"/> Yes, within 3 months | <input type="checkbox"/> further tests<br><input type="checkbox"/> diagnosis<br><input type="checkbox"/> treatment<br><input type="checkbox"/> told to come back |

| In the last 3 months or so, have you had the following....?<br><i>Please give an answer for each symptom</i>        | Were you worried about it?                                                                                                                                                                        | How much did it interfere with your life?                                                                                                                                                         | What did <u>you</u> think caused it?<br>(Please write) | Did you contact your doctor about it?                                                                                                                                                                                          | If you did contact your doctor, what was the outcome?                                                                                                            |
|---------------------------------------------------------------------------------------------------------------------|---------------------------------------------------------------------------------------------------------------------------------------------------------------------------------------------------|---------------------------------------------------------------------------------------------------------------------------------------------------------------------------------------------------|--------------------------------------------------------|--------------------------------------------------------------------------------------------------------------------------------------------------------------------------------------------------------------------------------|------------------------------------------------------------------------------------------------------------------------------------------------------------------|
| <b>5. Tiredness or lack of energy</b><br><input type="checkbox"/> NO <input type="checkbox"/> YES —————→<br>↓       | <input type="checkbox"/> Not at all<br><input type="checkbox"/> A little bit<br><input type="checkbox"/> Moderately<br><input type="checkbox"/> Quite a bit<br><input type="checkbox"/> Extremely | <input type="checkbox"/> Not at all<br><input type="checkbox"/> A little bit<br><input type="checkbox"/> Moderately<br><input type="checkbox"/> Quite a bit<br><input type="checkbox"/> Extremely | <br><br>                                               | <input type="checkbox"/> No<br><input type="checkbox"/> Yes, within 1-2 weeks<br><input type="checkbox"/> Yes, within 1 month<br><input type="checkbox"/> Yes, within 6 weeks<br><input type="checkbox"/> Yes, within 3 months | <input type="checkbox"/> further tests<br><input type="checkbox"/> diagnosis<br><input type="checkbox"/> treatment<br><input type="checkbox"/> told to come back |
| <b>6. Chest pain that didn't go away</b><br><input type="checkbox"/> NO <input type="checkbox"/> YES —————→<br>↓    | <input type="checkbox"/> Not at all<br><input type="checkbox"/> A little bit<br><input type="checkbox"/> Moderately<br><input type="checkbox"/> Quite a bit<br><input type="checkbox"/> Extremely | <input type="checkbox"/> Not at all<br><input type="checkbox"/> A little bit<br><input type="checkbox"/> Moderately<br><input type="checkbox"/> Quite a bit<br><input type="checkbox"/> Extremely | <br><br>                                               | <input type="checkbox"/> No<br><input type="checkbox"/> Yes, within 1-2 weeks<br><input type="checkbox"/> Yes, within 1 month<br><input type="checkbox"/> Yes, within 6 weeks<br><input type="checkbox"/> Yes, within 3 months | <input type="checkbox"/> further tests<br><input type="checkbox"/> diagnosis<br><input type="checkbox"/> treatment<br><input type="checkbox"/> told to come back |
| <b>7. Shoulder pain that didn't go away</b><br><input type="checkbox"/> NO <input type="checkbox"/> YES —————→<br>↓ | <input type="checkbox"/> Not at all<br><input type="checkbox"/> A little bit<br><input type="checkbox"/> Moderately<br><input type="checkbox"/> Quite a bit<br><input type="checkbox"/> Extremely | <input type="checkbox"/> Not at all<br><input type="checkbox"/> A little bit<br><input type="checkbox"/> Moderately<br><input type="checkbox"/> Quite a bit<br><input type="checkbox"/> Extremely | <br><br>                                               | <input type="checkbox"/> No<br><input type="checkbox"/> Yes, within 1-2 weeks<br><input type="checkbox"/> Yes, within 1 month<br><input type="checkbox"/> Yes, within 6 weeks<br><input type="checkbox"/> Yes, within 3 months | <input type="checkbox"/> further tests<br><input type="checkbox"/> diagnosis<br><input type="checkbox"/> treatment<br><input type="checkbox"/> told to come back |
| <b>8. Coughing up blood</b><br><input type="checkbox"/> NO <input type="checkbox"/> YES —————→<br>↓                 | <input type="checkbox"/> Not at all<br><input type="checkbox"/> A little bit<br><input type="checkbox"/> Moderately<br><input type="checkbox"/> Quite a bit<br><input type="checkbox"/> Extremely | <input type="checkbox"/> Not at all<br><input type="checkbox"/> A little bit<br><input type="checkbox"/> Moderately<br><input type="checkbox"/> Quite a bit<br><input type="checkbox"/> Extremely | <br><br>                                               | <input type="checkbox"/> No<br><input type="checkbox"/> Yes, within 1-2 weeks<br><input type="checkbox"/> Yes, within 1 month<br><input type="checkbox"/> Yes, within 6 weeks<br><input type="checkbox"/> Yes, within 3 months | <input type="checkbox"/> further tests<br><input type="checkbox"/> diagnosis<br><input type="checkbox"/> treatment<br><input type="checkbox"/> told to come back |

| In the last 3 months or so, have you had the following....?<br><i>Please give an answer for each symptom</i> | Were you worried about it?                                                                                                                                                                        | How much did it interfere with your life?                                                                                                                                                         | What did <u>you</u> think caused it?<br>(Please write) | Did you contact your doctor about it?                                                                                                                                                                                          | If you did contact your doctor, what was the outcome?                                                                                                            |
|--------------------------------------------------------------------------------------------------------------|---------------------------------------------------------------------------------------------------------------------------------------------------------------------------------------------------|---------------------------------------------------------------------------------------------------------------------------------------------------------------------------------------------------|--------------------------------------------------------|--------------------------------------------------------------------------------------------------------------------------------------------------------------------------------------------------------------------------------|------------------------------------------------------------------------------------------------------------------------------------------------------------------|
| <b>9. Painful cough</b><br><input type="checkbox"/> NO <input type="checkbox"/> YES →<br>↓                   | <input type="checkbox"/> Not at all<br><input type="checkbox"/> A little bit<br><input type="checkbox"/> Moderately<br><input type="checkbox"/> Quite a bit<br><input type="checkbox"/> Extremely | <input type="checkbox"/> Not at all<br><input type="checkbox"/> A little bit<br><input type="checkbox"/> Moderately<br><input type="checkbox"/> Quite a bit<br><input type="checkbox"/> Extremely | <br><br>                                               | <input type="checkbox"/> No<br><input type="checkbox"/> Yes, within 1-2 weeks<br><input type="checkbox"/> Yes, within 1 month<br><input type="checkbox"/> Yes, within 6 weeks<br><input type="checkbox"/> Yes, within 3 months | <input type="checkbox"/> further tests<br><input type="checkbox"/> diagnosis<br><input type="checkbox"/> treatment<br><input type="checkbox"/> told to come back |
| <b>10. Loss of appetite</b><br><input type="checkbox"/> NO <input type="checkbox"/> YES →<br>↓               | <input type="checkbox"/> Not at all<br><input type="checkbox"/> A little bit<br><input type="checkbox"/> Moderately<br><input type="checkbox"/> Quite a bit<br><input type="checkbox"/> Extremely | <input type="checkbox"/> Not at all<br><input type="checkbox"/> A little bit<br><input type="checkbox"/> Moderately<br><input type="checkbox"/> Quite a bit<br><input type="checkbox"/> Extremely | <br><br>                                               | <input type="checkbox"/> No<br><input type="checkbox"/> Yes, within 1-2 weeks<br><input type="checkbox"/> Yes, within 1 month<br><input type="checkbox"/> Yes, within 6 weeks<br><input type="checkbox"/> Yes, within 3 months | <input type="checkbox"/> further tests<br><input type="checkbox"/> diagnosis<br><input type="checkbox"/> treatment<br><input type="checkbox"/> told to come back |
| <b>11. Difficulty in swallowing</b><br><input type="checkbox"/> NO <input type="checkbox"/> YES →<br>↓       | <input type="checkbox"/> Not at all<br><input type="checkbox"/> A little bit<br><input type="checkbox"/> Moderately<br><input type="checkbox"/> Quite a bit<br><input type="checkbox"/> Extremely | <input type="checkbox"/> Not at all<br><input type="checkbox"/> A little bit<br><input type="checkbox"/> Moderately<br><input type="checkbox"/> Quite a bit<br><input type="checkbox"/> Extremely | <br><br>                                               | <input type="checkbox"/> No<br><input type="checkbox"/> Yes, within 1-2 weeks<br><input type="checkbox"/> Yes, within 1 month<br><input type="checkbox"/> Yes, within 6 weeks<br><input type="checkbox"/> Yes, within 3 months | <input type="checkbox"/> further tests<br><input type="checkbox"/> diagnosis<br><input type="checkbox"/> treatment<br><input type="checkbox"/> told to come back |
| <b>12. Change in an existing cough</b><br><input type="checkbox"/> NO <input type="checkbox"/> YES →<br>↓    | <input type="checkbox"/> Not at all<br><input type="checkbox"/> A little bit<br><input type="checkbox"/> Moderately<br><input type="checkbox"/> Quite a bit<br><input type="checkbox"/> Extremely | <input type="checkbox"/> Not at all<br><input type="checkbox"/> A little bit<br><input type="checkbox"/> Moderately<br><input type="checkbox"/> Quite a bit<br><input type="checkbox"/> Extremely | <br><br>                                               | <input type="checkbox"/> No<br><input type="checkbox"/> Yes, within 1-2 weeks<br><input type="checkbox"/> Yes, within 1 month<br><input type="checkbox"/> Yes, within 6 weeks<br><input type="checkbox"/> Yes, within 3 months | <input type="checkbox"/> further tests<br><input type="checkbox"/> diagnosis<br><input type="checkbox"/> treatment<br><input type="checkbox"/> told to come back |
| <b>13. Mouth ulcer that didn't heal</b><br><input type="checkbox"/> NO <input type="checkbox"/> YES →<br>↓   | <input type="checkbox"/> Not at all<br><input type="checkbox"/> A little bit<br><input type="checkbox"/> Moderately<br><input type="checkbox"/> Quite a bit<br><input type="checkbox"/> Extremely | <input type="checkbox"/> Not at all<br><input type="checkbox"/> A little bit<br><input type="checkbox"/> Moderately<br><input type="checkbox"/> Quite a bit<br><input type="checkbox"/> Extremely | <br><br>                                               | <input type="checkbox"/> No<br><input type="checkbox"/> Yes, within 1-2 weeks<br><input type="checkbox"/> Yes, within 1 month<br><input type="checkbox"/> Yes, within 6 weeks<br><input type="checkbox"/> Yes, within 3 months | <input type="checkbox"/> further tests<br><input type="checkbox"/> diagnosis<br><input type="checkbox"/> treatment<br><input type="checkbox"/> told to come back |

| In the last 3 months or so, have you had the following....?<br><i>Please give an answer for each symptom</i>                 | Were you worried about it?                                                                                                                                                                        | How much did it interfere with your life?                                                                                                                                                         | What did <u>you</u> think caused it?<br>(Please write) | Did you contact your doctor about it?                                                                                                                                                                                          | If you did contact your doctor, what was the outcome?                                                                                                            |
|------------------------------------------------------------------------------------------------------------------------------|---------------------------------------------------------------------------------------------------------------------------------------------------------------------------------------------------|---------------------------------------------------------------------------------------------------------------------------------------------------------------------------------------------------|--------------------------------------------------------|--------------------------------------------------------------------------------------------------------------------------------------------------------------------------------------------------------------------------------|------------------------------------------------------------------------------------------------------------------------------------------------------------------|
| <b>14. Numbness of lip or tongue</b><br><input type="checkbox"/> NO <input type="checkbox"/> YES →<br>↓                      | <input type="checkbox"/> Not at all<br><input type="checkbox"/> A little bit<br><input type="checkbox"/> Moderately<br><input type="checkbox"/> Quite a bit<br><input type="checkbox"/> Extremely | <input type="checkbox"/> Not at all<br><input type="checkbox"/> A little bit<br><input type="checkbox"/> Moderately<br><input type="checkbox"/> Quite a bit<br><input type="checkbox"/> Extremely | <hr/><br><hr/>                                         | <input type="checkbox"/> No<br><input type="checkbox"/> Yes, within 1-2 weeks<br><input type="checkbox"/> Yes, within 1 month<br><input type="checkbox"/> Yes, within 6 weeks<br><input type="checkbox"/> Yes, within 3 months | <input type="checkbox"/> further tests<br><input type="checkbox"/> diagnosis<br><input type="checkbox"/> treatment<br><input type="checkbox"/> told to come back |
| <b>15. Cold sore or cut on lip that didn't go away</b><br><input type="checkbox"/> NO <input type="checkbox"/> YES →<br>↓    | <input type="checkbox"/> Not at all<br><input type="checkbox"/> A little bit<br><input type="checkbox"/> Moderately<br><input type="checkbox"/> Quite a bit<br><input type="checkbox"/> Extremely | <input type="checkbox"/> Not at all<br><input type="checkbox"/> A little bit<br><input type="checkbox"/> Moderately<br><input type="checkbox"/> Quite a bit<br><input type="checkbox"/> Extremely | <hr/><br><hr/>                                         | <input type="checkbox"/> No<br><input type="checkbox"/> Yes, within 1-2 weeks<br><input type="checkbox"/> Yes, within 1 month<br><input type="checkbox"/> Yes, within 6 weeks<br><input type="checkbox"/> Yes, within 3 months | <input type="checkbox"/> further tests<br><input type="checkbox"/> diagnosis<br><input type="checkbox"/> treatment<br><input type="checkbox"/> told to come back |
| <b>16. Hoarse voice that lasted for more than 3 weeks</b><br><input type="checkbox"/> NO <input type="checkbox"/> YES →<br>↓ | <input type="checkbox"/> Not at all<br><input type="checkbox"/> A little bit<br><input type="checkbox"/> Moderately<br><input type="checkbox"/> Quite a bit<br><input type="checkbox"/> Extremely | <input type="checkbox"/> Not at all<br><input type="checkbox"/> A little bit<br><input type="checkbox"/> Moderately<br><input type="checkbox"/> Quite a bit<br><input type="checkbox"/> Extremely | <hr/><br><hr/>                                         | <input type="checkbox"/> No<br><input type="checkbox"/> Yes, within 1-2 weeks<br><input type="checkbox"/> Yes, within 1 month<br><input type="checkbox"/> Yes, within 6 weeks<br><input type="checkbox"/> Yes, within 3 months | <input type="checkbox"/> further tests<br><input type="checkbox"/> diagnosis<br><input type="checkbox"/> treatment<br><input type="checkbox"/> told to come back |
| <b>17. Lump in your neck</b><br><input type="checkbox"/> NO <input type="checkbox"/> YES →<br>↓                              | <input type="checkbox"/> Not at all<br><input type="checkbox"/> A little bit<br><input type="checkbox"/> Moderately<br><input type="checkbox"/> Quite a bit<br><input type="checkbox"/> Extremely | <input type="checkbox"/> Not at all<br><input type="checkbox"/> A little bit<br><input type="checkbox"/> Moderately<br><input type="checkbox"/> Quite a bit<br><input type="checkbox"/> Extremely | <hr/><br><hr/>                                         | <input type="checkbox"/> No<br><input type="checkbox"/> Yes, within 1-2 weeks<br><input type="checkbox"/> Yes, within 1 month<br><input type="checkbox"/> Yes, within 6 weeks<br><input type="checkbox"/> Yes, within 3 months | <input type="checkbox"/> further tests<br><input type="checkbox"/> diagnosis<br><input type="checkbox"/> treatment<br><input type="checkbox"/> told to come back |

## THE NEXT QUESTION IS ABOUT YOUR UNDERSTANDING OF SOME ILLNESSES

Here is a list of symptoms and illnesses. For each symptom, please tick which illness you think the symptom might be related to. You can tick as many illnesses that you think are related to each symptom.

|                                                    | Heart<br>disease         | Flu                      | Cancer                   | Asthma                   | Don't<br>know            |
|----------------------------------------------------|--------------------------|--------------------------|--------------------------|--------------------------|--------------------------|
| Sore throat                                        | <input type="checkbox"/> | <input type="checkbox"/> | <input type="checkbox"/> | <input type="checkbox"/> | <input type="checkbox"/> |
| Cough that does not go<br>away                     | <input type="checkbox"/> | <input type="checkbox"/> | <input type="checkbox"/> | <input type="checkbox"/> | <input type="checkbox"/> |
| Chest pain                                         | <input type="checkbox"/> | <input type="checkbox"/> | <input type="checkbox"/> | <input type="checkbox"/> | <input type="checkbox"/> |
| Unexplained pain that<br>does not go away          | <input type="checkbox"/> | <input type="checkbox"/> | <input type="checkbox"/> | <input type="checkbox"/> | <input type="checkbox"/> |
| Difficulty swallowing                              | <input type="checkbox"/> | <input type="checkbox"/> | <input type="checkbox"/> | <input type="checkbox"/> | <input type="checkbox"/> |
| Shortness of breath                                | <input type="checkbox"/> | <input type="checkbox"/> | <input type="checkbox"/> | <input type="checkbox"/> | <input type="checkbox"/> |
| A mouth ulcer that does<br>not heal                | <input type="checkbox"/> | <input type="checkbox"/> | <input type="checkbox"/> | <input type="checkbox"/> | <input type="checkbox"/> |
| Feeling tired or having<br>low energy              | <input type="checkbox"/> | <input type="checkbox"/> | <input type="checkbox"/> | <input type="checkbox"/> | <input type="checkbox"/> |
| Unexplained weight loss                            | <input type="checkbox"/> | <input type="checkbox"/> | <input type="checkbox"/> | <input type="checkbox"/> | <input type="checkbox"/> |
| Feeling your heart pound<br>or race                | <input type="checkbox"/> | <input type="checkbox"/> | <input type="checkbox"/> | <input type="checkbox"/> | <input type="checkbox"/> |
| Shoulder pain that does<br>not go away             | <input type="checkbox"/> | <input type="checkbox"/> | <input type="checkbox"/> | <input type="checkbox"/> | <input type="checkbox"/> |
| Coughing up blood                                  | <input type="checkbox"/> | <input type="checkbox"/> | <input type="checkbox"/> | <input type="checkbox"/> | <input type="checkbox"/> |
| Hoarse voice for more<br>than 3 weeks              | <input type="checkbox"/> | <input type="checkbox"/> | <input type="checkbox"/> | <input type="checkbox"/> | <input type="checkbox"/> |
| A cold sore or cut on lip<br>that does not go away | <input type="checkbox"/> | <input type="checkbox"/> | <input type="checkbox"/> | <input type="checkbox"/> | <input type="checkbox"/> |
| Lump in your neck                                  | <input type="checkbox"/> | <input type="checkbox"/> | <input type="checkbox"/> | <input type="checkbox"/> | <input type="checkbox"/> |

**NOW WE WANT TO ASK YOU ABOUT GOING TO SEE THE DOCTOR**

**How often do you visit your doctor (GP)?**

**Please tick one box only**

- |                             |                          |
|-----------------------------|--------------------------|
| Less often than once a year | <input type="checkbox"/> |
| About once a year           | <input type="checkbox"/> |
| About every six months      | <input type="checkbox"/> |
| About every three months    | <input type="checkbox"/> |
| At least once a month       | <input type="checkbox"/> |
| Most weeks                  | <input type="checkbox"/> |

**When you experience a new health problem that worries you, what is the first thing that you are likely to do?**

**Please tick one box only.**

- |                                                                                |                          |
|--------------------------------------------------------------------------------|--------------------------|
| Do nothing                                                                     | <input type="checkbox"/> |
| Talk to friends or family                                                      | <input type="checkbox"/> |
| Wait to see if it will go away                                                 | <input type="checkbox"/> |
| Go to see your doctor                                                          | <input type="checkbox"/> |
| Go onto the internet to try and find out what it might be                      | <input type="checkbox"/> |
| Go to the pharmacy to buy some medicine                                        | <input type="checkbox"/> |
| Wait a couple of weeks, and if the symptoms persist, then go to see the doctor | <input type="checkbox"/> |

## FINALLY, A FEW QUESTIONS ABOUT YOU

|                                                                                                                                                               |                               |                                 |                          |
|---------------------------------------------------------------------------------------------------------------------------------------------------------------|-------------------------------|---------------------------------|--------------------------|
| <b>What is your age and gender?</b>                                                                                                                           |                               |                                 |                          |
| <b>Age:</b> years                                                                                                                                             | Male <input type="checkbox"/> | Female <input type="checkbox"/> |                          |
| <b>What is your relationship status? Please tick the box that best describes you</b>                                                                          |                               |                                 |                          |
| I am single                                                                                                                                                   |                               | <input type="checkbox"/>        |                          |
| I live with my husband/wife/partner                                                                                                                           |                               | <input type="checkbox"/>        |                          |
| I am widowed                                                                                                                                                  |                               | <input type="checkbox"/>        |                          |
| I am separated/divorced                                                                                                                                       |                               | <input type="checkbox"/>        |                          |
| I have a partner who does not live with me                                                                                                                    |                               | <input type="checkbox"/>        |                          |
| <b>What is the highest level of education qualification you have obtained?</b>                                                                                |                               |                                 |                          |
| <b>Please tick one box only</b>                                                                                                                               |                               |                                 |                          |
| Degree or higher degree                                                                                                                                       | <input type="checkbox"/>      | O Level or GCSE (Grade D - G)   | <input type="checkbox"/> |
| A Levels or Highers                                                                                                                                           | <input type="checkbox"/>      | No formal qualifications        | <input type="checkbox"/> |
| HNC/HND                                                                                                                                                       | <input type="checkbox"/>      | Still studying                  | <input type="checkbox"/> |
| ONC/BTEC                                                                                                                                                      | <input type="checkbox"/>      | Other.....                      | <input type="checkbox"/> |
| O Level or GCSE equivalent (Grade A-C)                                                                                                                        | <input type="checkbox"/>      |                                 |                          |
| <b>Please tick which best describes your living arrangements:</b>                                                                                             |                               |                                 |                          |
| Own house (outright)                                                                                                                                          |                               | <input type="checkbox"/>        |                          |
| Own house (mortgage)                                                                                                                                          |                               | <input type="checkbox"/>        |                          |
| Rent from Local Authority/ Housing Association                                                                                                                |                               | <input type="checkbox"/>        |                          |
| Rent privately                                                                                                                                                |                               | <input type="checkbox"/>        |                          |
| Other (e.g. living with family/ friends)                                                                                                                      |                               | <input type="checkbox"/>        |                          |
| <b>Do you live alone?</b> Yes <input type="checkbox"/> No <input type="checkbox"/> <b>If No, how many people live in your house?</b> <input type="checkbox"/> |                               |                                 |                          |
| <b>Does your household own a car or van? Please tick one box only</b>                                                                                         |                               |                                 |                          |
| No                                                                                                                                                            | <input type="checkbox"/>      | Yes, one                        | <input type="checkbox"/> |
|                                                                                                                                                               |                               | Yes, more than one              | <input type="checkbox"/> |
| <b>Have you, your family or close friends had cancer? Please tick one box for each person in the list</b>                                                     |                               |                                 |                          |
|                                                                                                                                                               | Yes                           | No                              | Don't know               |
| You                                                                                                                                                           | <input type="checkbox"/>      | <input type="checkbox"/>        | <input type="checkbox"/> |
| Partner/husband/wife (if applicable)                                                                                                                          | <input type="checkbox"/>      | <input type="checkbox"/>        | <input type="checkbox"/> |
| Close family member                                                                                                                                           | <input type="checkbox"/>      | <input type="checkbox"/>        | <input type="checkbox"/> |
| Other family member                                                                                                                                           | <input type="checkbox"/>      | <input type="checkbox"/>        | <input type="checkbox"/> |
| Close friend                                                                                                                                                  | <input type="checkbox"/>      | <input type="checkbox"/>        | <input type="checkbox"/> |
| Other friend                                                                                                                                                  | <input type="checkbox"/>      | <input type="checkbox"/>        | <input type="checkbox"/> |

**Do you have someone that you can talk to if you are having problems?**

Yes ☐ No ☐

**Which of these best describes you? Please tick one box only**

I have never smoked ☐

I used to smoke regularly but I am now an ex-smoker ☐

- If you answered ex-smoker, did you give up in the last 12 months? Yes ☐ No ☐

I am a current smoker ☐

**If you answered current smoker, how much do you smoke? Please tick one box only**

If you smoke cigarettes - how many do you smoke on an average day? Number

If you smoke tobacco, how many oz do you smoke in an average week?  oz

**Which of these best describes your ethnic group? Please tick one box only**

| White                                               | Mixed                                               | Asian or Asian British                              | Black or Black British                              | Chinese other                       |
|-----------------------------------------------------|-----------------------------------------------------|-----------------------------------------------------|-----------------------------------------------------|-------------------------------------|
| White British <input type="checkbox"/>              | White and Black Caribbean <input type="checkbox"/>  | Indian <input type="checkbox"/>                     | Black Caribbean <input type="checkbox"/>            | Chinese <input type="checkbox"/>    |
| White Irish <input type="checkbox"/>                | White and Black African <input type="checkbox"/>    | Pakistani <input type="checkbox"/>                  | Black African <input type="checkbox"/>              | Other..... <input type="checkbox"/> |
| White, other European <input type="checkbox"/>      | White and Asian <input type="checkbox"/>            | Bangladeshi <input type="checkbox"/>                | Any other Black background <input type="checkbox"/> |                                     |
| Any other White background <input type="checkbox"/> | Any other mixed background <input type="checkbox"/> | Any other Asian background <input type="checkbox"/> |                                                     |                                     |

**If you haven't lived in the UK all your life, how many years have you been living in the UK?**

**THANK YOU VERY MUCH FOR COMPLETING THIS QUESTIONNAIRE**

**IMPORTANT:**

**IF YOU ARE WORRIED ABOUT ANY SYMPTOMS OR IF YOU ARE EXPERIENCING PERSISTENT SYMPTOMS YOU SHOULD GO TO YOUR GP FOR ADVICE**

**THIS PAGE HAS BEEN LEFT BLANK INTENTIONALLY.**

## FURTHER INFORMATION

**We would like to contact some people who take part in this survey to tell us more about their health and experiences in an interview. Would you be prepared to be contacted again?**

**Yes** ☐

**No** ☐

If yes, please provide your details below (this information will be treated in the strictest confidence):

Name \_\_\_\_\_

Address \_\_\_\_\_

\_\_\_\_\_

\_\_\_\_\_

\_\_\_\_\_

Email \_\_\_\_\_

Telephone \_\_\_\_\_

**If you would like to receive a summary of the results from this survey when it is completed, please fill in your contact details below.**

*Information provided here will not be used to contact you about taking part in any other research.*

Name \_\_\_\_\_

Address \_\_\_\_\_

\_\_\_\_\_

\_\_\_\_\_

\_\_\_\_\_

Email \_\_\_\_\_

For office use only

|  |  |  |  |  |
|--|--|--|--|--|
|  |  |  |  |  |
|--|--|--|--|--|
